# Supplementary material for: Detection of active transposable elements in Arabidopsis thaliana using Oxford Nanopore Sequencing technology
Source: PubMed Central journal article supplement (PMC5513335; doi:10.1186/s12864-017-3753-z), 2017-07-17
Supplement: 12864_2017_3753_MOESM4_ESM.pdf [file 12864_2017_3753_MOESM4_ESM.pdf]

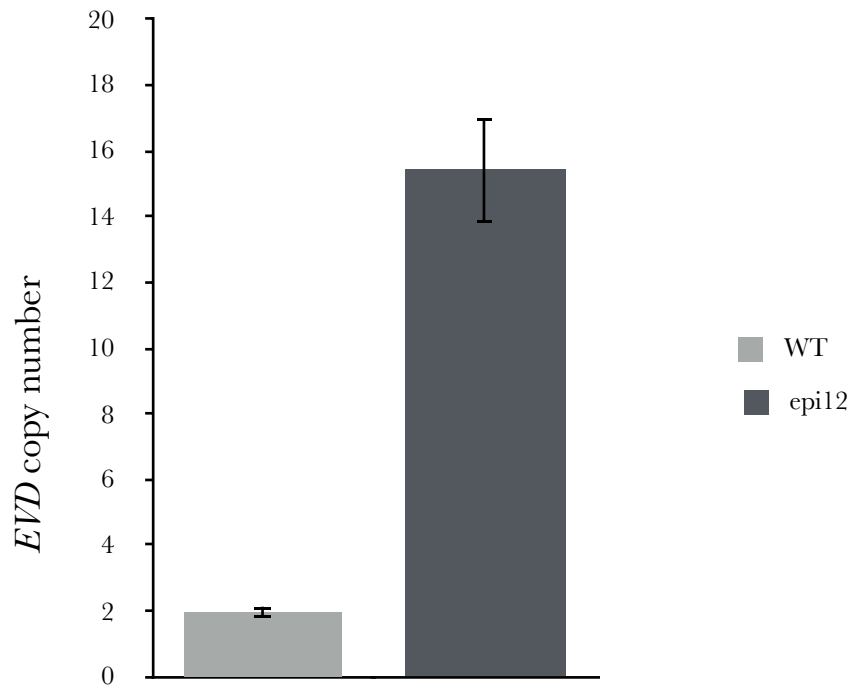

Figure S1.
